# Supplementary material for: Extracellular ATP promotes breast cancer invasion and epithelial‐mesenchymal transition via hypoxia‐inducible factor 2α signaling
Source: PubMed Central journal article supplement — Cancer Sci. 2019 Jul 10;110(8):2456–70. doi: 10.1111/cas.14086 (PMC6676128; doi:10.1111/cas.14086), 2019-07-10
Supplement: CAS-110-2456-s002.pdf [file CAS-110-2456-s002.pdf]

1

## Appendix S2 (The sequences of siRNAs)

2

This document provides detailed siRNA sequence we used in this research.

3

### The sequences of siRNAs

|               |                         |
|---------------|-------------------------|
| Control-siRNA | UUCUCCGAACGUGUCACGU     |
| P2Y2-siRNA#1  | GUGCUAACAGUUGCCUUGA     |
| P2Y2-siRNA#2  | GCCCAAGAGAUGAACAUUCU    |
| HIF1A-siRNA#1 | GAGGAAAAGGGAAAAUCUAUU   |
| HIF1A-siRNA#2 | GUGGUUGGAUCUAACACUA     |
| HIF2A-siRNA#1 | GCGACAGCUGGAGUAUGAAUUTT |
| HIF2A-siRNA#2 | CAGCAUCUUUGAUAGCAGUTT   |
| PGK1-siRNA#1  | GGATGTCTATGTCAATGATGC   |
| PGK1-siRNA#2  | GCTTCTGGGAACAAGGTAAA    |
| AKT-siRNA#1   | GAACAAUCCGAUUCACGUATT   |
| AKT-siRNA#2   | UGACUUCGACUAUCUCAAAATT  |
| LOXL2-siRNA#1 | GAAGGAGACAUCCAGAAGATT   |
| LOXL2-siRNA#2 | ATTACTCCAACAACATCAT     |

|              |                          |
|--------------|--------------------------|
| MMP9-siRNA#1 | CAUCACCUA UUG GAUCCA ATT |
| MMP9-siRNA#2 | GACUUGCCGCGAGACAUGATT    |

4
